# Supplementary material for: HbA1c level as a risk factor for retinopathy and nephropathy in children and adults with type 1 diabetes: Swedish population based cohort study
Source: PubMed Central journal article supplement — BMJ. 2019 Aug 28;366:l4894. doi: 10.1136/bmj.l4894 (PMC6712507; doi:10.1136/bmj.l4894), 2019-08-28
Supplement: linm050180.ww1.pdf [file linm050180.ww1.pdf]

## **Online-Only Supplemental Material**

This appendix has been provided by the authors to give readers additional information about their work.

Supplement to:

### **HbA<sub>1c</sub> level as a risk factor for retinopathy and nephropathy in children and adults with type 1 diabetes: Swedish population based cohort study**

Lind M, Pivodic A, Svensson A-M, Ólafsdóttir AF, Wedel H, Ludvigsson J.

## Table of contents

|                                                                                                                                                                                                                                               |   |
|-----------------------------------------------------------------------------------------------------------------------------------------------------------------------------------------------------------------------------------------------|---|
| Table of contents.....                                                                                                                                                                                                                        | 2 |
| Supplemental Figure 1. Study cohorts.....                                                                                                                                                                                                     | 3 |
| Supplemental Table 1. Patient characteristics for overall cohort and for patients with HbA1c AUC <48 mmol/mol.....                                                                                                                            | 4 |
| Supplemental Table 2.1 Number and percent of retinopathy endpoints for each time period and the effect of HbA1c AUC categories and HbA1c AUC per 10 mmol/mol increase on endpoints by using unadjusted and adjusted logistic regression. .... | 5 |
| Supplemental Table 2.2 Number and percent of albuminuria endpoints for each time period and the effect of HbA1c AUC categories on endpoints by using unadjusted and adjusted logistic regression. ....                                        | 7 |

**Supplemental Figure 1. Study cohorts**

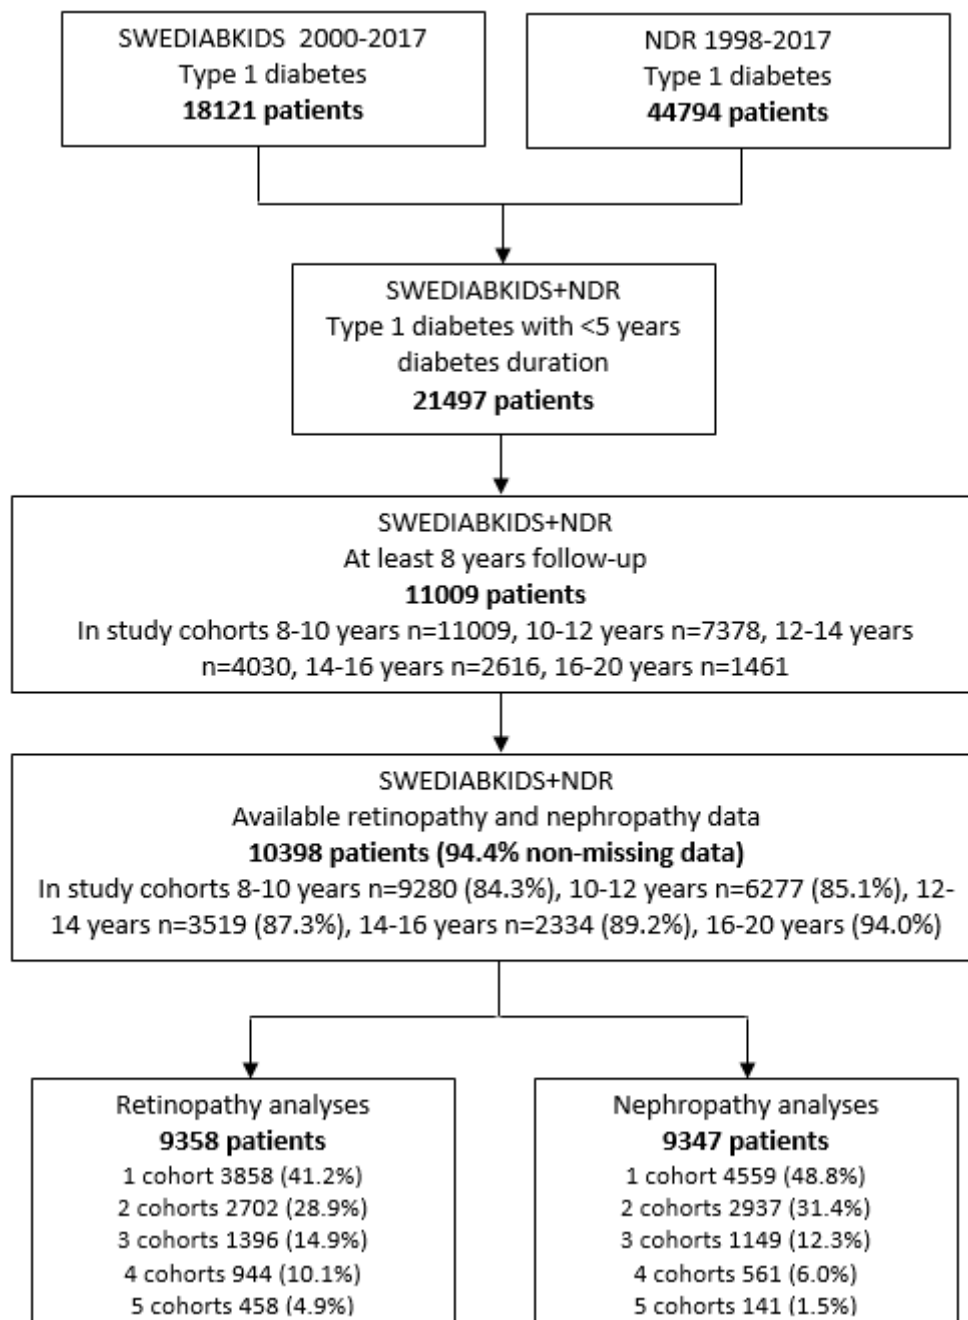

Legend Figure 1. Flow-chart of various steps of included patients in the analyses.

**Supplemental Table 1. Patient characteristics for overall cohort and for patients with HbA1c AUC <48 mmol/mol.**

| Variable                                                                                                                   | HbA1c AUC <48 mmol/mol                        |                                                |                                                     |
|----------------------------------------------------------------------------------------------------------------------------|-----------------------------------------------|------------------------------------------------|-----------------------------------------------------|
|                                                                                                                            | All patients<br>(n=10398)                     | No PDR/Laser or<br>macroalbuminuria<br>(n=769) | PDR/Laser or<br>macroalbuminuria any time<br>(n=12) |
| Diabetes onset year                                                                                                        | 2003 (4)<br>2004 (1993; 2009)<br>n=10398      | 2003 (4)<br>2004 (1993; 2009)<br>n=769         | 2004 (4)<br>2003 (1999; 2009)<br>n=12               |
| Age at first visit                                                                                                         | 14.7 (8.1)<br>13.0 (0.0; 34.0)<br>n=10398     | 20.2 (7.4)<br>21.0 (0.9; 34.0)<br>n=769        | 22.7 (8.2)<br>23.5 (2.1; 33.0)<br>n=12              |
| HbA1c AUC for longest follow-up                                                                                            | 63.4 (11.7)<br>62.3 (29.1; 120.9)<br>n=10398  | 43.9 (3.8)<br>45.1 (29.1; 48.0)<br>n=769       | 45.1 (3.0)<br>45.7 (38.8; 47.9)<br>n=12             |
| SBP mean for longest follow-up                                                                                             | 116.3 (8.9)<br>115.9 (80.0; 175.0)<br>n=10372 | 117.9 (9.3)<br>117.6 (92.0; 166.7)<br>n=767    | 119.6 (7.2)<br>120.4 (103.0; 131.2)<br>n=12         |
| DBP mean for longest follow-up                                                                                             | 69.8 (6.0)<br>69.6 (47.1; 105.0)<br>n=10372   | 70.5 (5.9)<br>70.4 (52.0; 94.4)<br>n=767       | 72.0 (7.0)<br>71.3 (59.8; 84.9)<br>n=12             |
| BMI mean for longest follow-up                                                                                             | 22.7 (4.1)<br>22.2 (13.2; 48.4)<br>n=10362    | 23.1 (3.6)<br>22.9 (13.9; 39.9)<br>n=762       | 21.9 (3.2)<br>21.9 (16.9; 27.8)<br>n=12             |
| HDL mean for longest follow-up                                                                                             | 1.52 (0.38)<br>1.48 (0.40; 5.90)<br>n=9171    | 1.55 (0.37)<br>1.50 (0.70; 4.40)<br>n=712      | 1.61 (0.51)<br>1.56 (0.78; 2.30)<br>n=11            |
| LDL mean for longest follow-up                                                                                             | 2.52 (0.68)<br>2.45 (-0.36; 8.94)<br>n=9156   | 2.40 (0.62)<br>2.36 (0.80; 4.76)<br>n=708      | 2.05 (0.33)<br>1.87 (1.72; 2.54)<br>n=11            |
| Cholesterol mean for longest follow-up                                                                                     | 4.48 (0.78)<br>4.41 (2.20; 11.00)<br>n=9370   | 4.32 (0.71)<br>4.29 (2.25; 7.33)<br>n=717      | 4.11 (0.45)<br>4.17 (3.55; 4.80)<br>n=11            |
| Triglycerides mean for longest follow-up                                                                                   | 1.07 (0.68)<br>0.90 (0.20; 18.06)<br>n=8920   | 0.881 (0.420)<br>0.776 (0.200; 3.640)<br>n=708 | 0.928 (0.360)<br>0.900 (0.400; 1.600)<br>n=11       |
| Smoking max for longest follow-up                                                                                          |                                               |                                                |                                                     |
| No                                                                                                                         | 6837 (77.3%)                                  | 625 (88.7%)                                    | 11 (100.0%)                                         |
| Yes                                                                                                                        | 2010 (22.7%)                                  | 80 (11.3%)                                     | 0 (0.0%)                                            |
| For categorical variables n (%) is presented.<br>For continuous variables Mean (SD) / Median (Min; Max) / n= is presented. |                                               |                                                |                                                     |

**Supplemental Table 2.1 Number and percent of retinopathy endpoints for each time period and the effect of HbA1c AUC categories and HbA1c AUC per 10 mmol/mol increase on endpoints by using unadjusted and adjusted logistic regression.**

|                                                  | Any retinopathy vs None |                                                    |                              | PPDR/PDR/Laser vs None/Simplex |                                                    |                              | PDR/Laser vs None/Simplex/PPDR |                                                    |                              |
|--------------------------------------------------|-------------------------|----------------------------------------------------|------------------------------|--------------------------------|----------------------------------------------------|------------------------------|--------------------------------|----------------------------------------------------|------------------------------|
|                                                  | n (%) events            | Unadjusted                                         | Adjusted**                   | n (%) events                   | Unadjusted                                         | Adjusted**                   | n (%) events                   | Unadjusted                                         | Adjusted*                    |
| <b>Follow-up 8-10 years from onset (n=8049)</b>  |                         |                                                    |                              |                                |                                                    |                              |                                |                                                    |                              |
| <48                                              | 55 (8.8%)               | 0.90 (0.63-1.29)                                   | 0.83 (0.56-1.23)             | 6 (1.0%)                       | 4.21 (0.85-20.93)                                  | 2.88 (0.58-14.40)            | 5 (0.8%)                       | 3.50 (0.68-18.12)                                  | 2.55 (0.49-13.27)            |
| 48-52                                            | 84 (9.6%)               | 1.00                                               | 1.00                         | 2 (0.2%)                       | 1.00                                               | 1.00                         | 2 (0.2%)                       | 1.00                                               | 1.00                         |
| 53-57                                            | 164 (11.6%)             | 1.23 (0.93-1.62)                                   | 1.47 (1.06-2.04)             | 3 (0.2%)                       | 0.92 (0.15-5.54)                                   | 0.78 (0.11-5.59)             | 2 (0.1%)                       | 0.62 (0.09-4.37)                                   | 0.79 (0.11-5.64)             |
| 58-70                                            | 569 (16.6%)             | 1.87 (1.47-2.38)                                   | 2.11 (1.58-2.82)             | 24 (0.7%)                      | 3.07 (0.72-13.02)                                  | 3.92 (0.91-16.91)            | 7 (0.2%)                       | 0.89 (0.18-4.30)                                   | 1.34 (0.28-6.50)             |
| >70                                              | 491 (28.6%)             | 3.75 (2.93-4.80)<br>c=0.63                         | 3.55 (2.63-4.80)             | 35 (2.0%)                      | 9.04 (2.17-37.65)<br>c=0.69                        | 7.75 (1.78-33.72)            | 7 (0.4%)                       | 1.78 (0.37-8.58)<br>c=0.64                         | 2.32 (0.48-11.26)            |
| HbA1c AUC (OR per 10 units)                      |                         | 1.55 (1.47-1.63)<br>p<0.0001<br>c=0.64 (0.62-0.66) | 1.51 (1.42-1.62)<br>p<0.0001 |                                | 1.92 (1.64-2.24)<br>p<0.0001<br>c=0.70 (0.63-0.77) | 1.78 (1.46-2.16)<br>p<0.0001 |                                | 1.24 (0.89-1.73)<br>c=0.51                         | 1.31 (0.97-1.77)<br>p=0.073  |
| <b>Follow-up 10-11 years from onset (n=5324)</b> |                         |                                                    |                              |                                |                                                    |                              |                                |                                                    |                              |
| <48                                              | 18 (6.6%)               | 0.44 (0.26-0.76)                                   | 0.43 (0.24-0.76)             | 2 (0.7%)                       | 1.81 (0.25-12.92)                                  | 2.85 (0.26-31.69)            | 1 (0.4%)                       | 1.81 (0.11-29.01)                                  | 1.44 (0.09-23.28)            |
| 48-52                                            | 68 (13.9%)              | 1.00                                               | 1.00                         | 2 (0.4%)                       | 1.00                                               | 1.00                         | 1 (0.2%)                       | 1.00                                               | 1.00                         |
| 53-57                                            | 127 (14.8%)             | 1.08 (0.78-1.48)                                   | 1.00 (0.69-1.44)             | 3 (0.3%)                       | 0.85 (0.14-5.13)                                   | 1.56 (0.14-17.35)            | 3 (0.3%)                       | 1.71 (0.18-16.51)                                  | 2.11 (0.22-20.47)            |
| 58-70                                            | 523 (21.7%)             | 1.72 (1.31-2.26)                                   | 1.71 (1.24-2.36)             | 16 (0.7%)                      | 1.63 (0.37-7.11)                                   | 4.94 (0.64-38.06)            | 5 (0.2%)                       | 1.02 (0.12-8.71)                                   | 1.40 (0.16-12.23)            |
| >70                                              | 483 (37.2%)             | 3.67 (2.77-4.85)<br>c=0.64                         | 3.18 (2.28-4.42)             | 35 (2.7%)                      | 6.75 (1.62-28.16)<br>c=0.70                        | 11.94 (1.57-91.04)           | 13 (1.0%)                      | 4.94 (0.64-37.84)<br>c=0.68                        | 5.95 (0.77-46.21)            |
| HbA1c AUC (OR per 10 units)                      |                         | 1.75 (1.64-1.86)<br>p<0.0001<br>c=0.66 (0.64-0.68) | 1.67 (1.54-1.80)<br>p<0.0001 |                                | 2.42 (2.01-2.91)<br>p<0.0001<br>c=0.75 (0.67-0.83) | 2.28 (1.82-2.85)<br>p<0.0001 |                                | 2.17 (1.65-2.86)<br>p<0.0001<br>c=0.69 (0.55-0.83) | 2.07 (1.59-2.70)<br>p<0.0001 |
| <b>Follow-up 12-13 years from onset (n=3044)</b> |                         |                                                    |                              |                                |                                                    |                              |                                |                                                    |                              |
| <48                                              | 6 (12.2%)               | 0.73 (0.28-1.86)                                   | 0.55 (0.19-1.55)             | 0 (0.0%)                       | 3.77 (0.07-197.20)F                                |                              | 0 (0.0%)                       | 3.77 (0.07-197.20)F                                |                              |
| 48-52                                            | 30 (16.1%)              | 1.00                                               | 1.00                         | 0 (0.0%)                       | 1.00                                               |                              | 0 (0.0%)                       | 1.00                                               |                              |
| 53-57                                            | 77 (17.7%)              | 1.12 (0.71-1.78)                                   | 1.11 (0.65-1.87)             | 2 (0.5%)                       | 2.16 (0.10-45.46)F                                 |                              | 1 (0.2%)                       | 1.29 (0.05-32.06)F                                 |                              |
| 58-70                                            | 454 (29.6%)             | 2.19 (1.46-3.28)                                   | 1.95 (1.24-3.07)             | 19 (1.2%)                      | 4.80 (0.29-80.41)F                                 |                              | 4 (0.3%)                       | 1.10 (0.06-20.60)F                                 |                              |
| >70                                              | 411 (48.9%)             | 4.97 (3.29-7.52)<br>c=0.64                         | 3.61 (2.26-5.78)             | 57 (6.8%)                      | 27.34 (1.67-447.71)F<br>c=0.75                     |                              | 20 (2.4%)                      | 9.31 (0.56-155.76)F<br>c=0.77                      |                              |
| HbA1c AUC (OR per 10 units)                      |                         | 1.89 (1.74-2.05)<br>p<0.0001<br>c=0.67 (0.65-0.69) | 1.72 (1.55-1.91)<br>p<0.0001 |                                | 2.96 (2.45-3.58)<br>p<0.0001<br>c=0.82 (0.77-0.87) | 2.83 (2.20-3.65)<br>p<0.0001 |                                | 3.69 (2.72-5.02)<br>p<0.0001<br>c=0.86 (0.78-0.94) | 3.09 (2.24-4.25)<br>p<0.0001 |
| <b>Follow-up 14-15 years from onset (n=1927)</b> |                         |                                                    |                              |                                |                                                    |                              |                                |                                                    |                              |
| <48                                              | 2 (10.0%)               | 0.55 (0.12-2.59)                                   | 0.53 (0.11-2.68)             | 0 (0.0%)                       | 4.95 (0.09-272.41) F                               |                              | 0 (0.0%)                       | 4.95 (0.09-272.40)F                                |                              |
| 48-52                                            | 17 (16.8%)              | 1.00                                               | 1.00                         | 0 (0.0%)                       | 1.00                                               |                              | 0 (0.0%)                       | 1.00                                               |                              |
| 53-57                                            | 60 (24.6%)              | 1.61 (0.89-2.93)                                   | 1.70 (0.87-3.32)             | 2 (0.8%)                       | 2.09 (0.10-44.58)F                                 |                              | 1 (0.4%)                       | 1.25 (0.05-31.38)F                                 |                              |
| 58-70                                            | 352 (35.8%)             | 2.76 (1.61-4.72)                                   | 2.84 (1.56-5.16)             | 12 (1.2%)                      | 2.61 (0.15-45.05) F                                |                              | 2 (0.2%)                       | 0.52 (0.02-10.98)F                                 |                              |

|                                                                                                                               | Any retinopathy vs None |                                                     |                               | PPDR/PDR/Laser vs None/Simplex |                                                     |                               | PDR/Laser vs None/Simplex/PPDR |                                                     |                               |
|-------------------------------------------------------------------------------------------------------------------------------|-------------------------|-----------------------------------------------------|-------------------------------|--------------------------------|-----------------------------------------------------|-------------------------------|--------------------------------|-----------------------------------------------------|-------------------------------|
|                                                                                                                               | n (%) events            | Unadjusted                                          | Adjusted**                    | n (%) events                   | Unadjusted                                          | Adjusted**                    | n (%) events                   | Unadjusted                                          | Adjusted*                     |
| <b>&gt;70</b>                                                                                                                 | 352 (60.8%)             | 7.66 (4.43-13.24)<br>c=0.66                         | 6.61 (3.57-12.24)             | 59 (10.2%)                     | 23.21 (1.40-383.63) F<br>c=0.77                     |                               | 23 (4.0%)                      | 8.57 (0.51-144.21)F<br>c=0.80                       |                               |
| <b>HbA1c AUC (OR per 10 units)</b>                                                                                            |                         | 2.08 (1.86-2.32)<br>p=<0.0001<br>c=0.69 (0.67-0.71) | 1.91 (1.67-2.18)<br>p=<0.0001 |                                | 3.18 (2.57-3.93)<br>p=<0.0001<br>c=0.83 (0.78-0.88) | 2.69 (2.08-3.48)<br>p=<0.0001 |                                | 4.60 (3.22-6.57)<br>p=<0.0001<br>c=0.89 (0.82-0.97) | 4.15 (2.87-5.99)<br>p=<0.0001 |
| <b>Follow-up 16-20 years from onset (n=1172)</b>                                                                              |                         |                                                     |                               |                                |                                                     |                               |                                |                                                     |                               |
| <b>&lt;48</b>                                                                                                                 | 4 (40.0%)               | 2.04 (0.51-8.23)                                    | 2.89 (0.69-12.15)             | 0 (0.0%)                       | 0.00 (0.00-infinity)                                | 0.00 (0.00-infinity)          | 0 (0.0%)                       | 1.92 (0.06-57.22)F                                  |                               |
| <b>48-52</b>                                                                                                                  | 15 (24.6%)              | 1.00                                                | 1.00                          | 1 (1.6%)                       | 1.00                                                | 1.00                          | 1 (1.6%)                       | 1.00                                                |                               |
| <b>53-57</b>                                                                                                                  | 52 (34.2%)              | 1.59 (0.81-3.12)                                    | 2.11 (1.02-4.37)              | 2 (1.3%)                       | 0.80 (0.07-8.99)                                    | 1.16 (0.10-13.52)             | 0 (0.0%)                       | 0.13 (0.01-3.34)F                                   |                               |
| <b>58-70</b>                                                                                                                  | 301 (51.3%)             | 3.23 (1.76-5.91)                                    | 3.50 (1.82-6.74)              | 21 (3.6%)                      | 2.23 (0.29-16.84)                                   | 2.71 (0.34-21.38)             | 6 (1.0%)                       | 0.45 (0.07-2.75)F                                   |                               |
| <b>&gt;70</b>                                                                                                                 | 269 (74.3%)             | 8.87 (4.73-16.63)<br>c=0.66                         | 6.97 (3.48-13.94)             | 64 (17.7%)                     | 12.89 (1.75-94.70)<br>c=0.74                        | 9.43 (1.21-73.56)             | 30 (8.3%)                      | 3.70 (0.69-19.75)F<br>c=0.77                        |                               |
| <b>HbA1c AUC (OR per 10 units)</b>                                                                                            |                         | 2.11 (1.83-2.43)<br>p=<0.0001<br>c=0.69 (0.66-0.72) | 1.78 (1.51-2.09)<br>p=<0.0001 |                                | 3.01 (2.45-3.71)<br>p=<0.0001<br>c=0.81 (0.76-0.86) | 2.45 (1.92-3.12)<br>p=<0.0001 |                                | 3.14 (2.40-4.12)<br>p=<0.0001<br>c=0.86 (0.79-0.92) | 2.87 (2.18-3.79)<br>p=<0.0001 |
| * Adjusted for age and sex                                                                                                    |                         |                                                     |                               |                                |                                                     |                               |                                |                                                     |                               |
| ** Additionally adjusted for mean SBP, mean DBP, mean BMI, mean HDL, mean LDL, mean cholesterol, mean triglycerides, smoking. |                         |                                                     |                               |                                |                                                     |                               |                                |                                                     |                               |
| F=Firth's penalized maximum likelihood estimation                                                                             |                         |                                                     |                               |                                |                                                     |                               |                                |                                                     |                               |

**Supplemental Table 2.2 Number and percent of albuminuria endpoints for each time period and the effect of HbA1c AUC categories on endpoints by using unadjusted and adjusted logistic regression.**

|                                                                                                                               | Microalbuminuria/Macroalbuminuria vs None |                                                    |                              | Macroalbuminuria vs None/Microalbuminuria |                                                    |                              |
|-------------------------------------------------------------------------------------------------------------------------------|-------------------------------------------|----------------------------------------------------|------------------------------|-------------------------------------------|----------------------------------------------------|------------------------------|
|                                                                                                                               | n (%) events                              | Unadjusted                                         | Adjusted**                   | n (%) events                              | Unadjusted                                         | Adjusted*                    |
| <b>Follow-up 8-9 years from onset (n=6476)</b>                                                                                |                                           |                                                    |                              |                                           |                                                    |                              |
| <48                                                                                                                           | 24 (3.6%)                                 | 1.06 (0.61-1.86)                                   | 1.02 (0.56-1.86)             | 7 (1.1%)                                  | 1.40 (0.47-4.18)                                   | 1.22 (0.41-3.67)             |
| 48-52                                                                                                                         | 27 (3.4%)                                 | 1.00                                               | 1.00                         | 6 (0.8%)                                  | 1.00                                               | 1.00                         |
| 53-57                                                                                                                         | 60 (5.4%)                                 | 1.62 (1.02-2.57)                                   | 1.70 (1.02-2.84)             | 8 (0.7%)                                  | 0.95 (0.33-2.75)                                   | 1.03 (0.36-2.99)             |
| 58-70                                                                                                                         | 134 (5.5%)                                | 1.65 (1.08-2.51)                                   | 1.55 (0.97-2.46)             | 29 (1.2%)                                 | 1.58 (0.65-3.81)                                   | 1.79 (0.74-4.35)             |
| >70                                                                                                                           | 145 (9.7%)                                | 3.04 (2.00-4.63)<br>c=0.60                         | 2.52 (1.58-4.03)             | 21 (1.4%)                                 | 1.86 (0.75-4.64)<br>c=0.56                         | 1.97 (0.79-4.92)             |
| HbA1c AUC (OR per 10 units)                                                                                                   |                                           | 1.39 (1.29-1.50)<br>p<0.0001<br>c=0.61 (0.58-0.64) | 1.31 (1.20-1.43)<br>p<0.0001 |                                           | 1.21 (1.01-1.44)<br>p=0.034<br>c=0.56 (0.49-0.63)  | 1.23 (1.04-1.46)<br>p=0.017  |
| <b>Follow-up 10-11 years from onset (n=4490)</b>                                                                              |                                           |                                                    |                              |                                           |                                                    |                              |
| <48                                                                                                                           | 10 (3.6%)                                 | 1.09 (0.48-2.46)                                   | 1.09 (0.45-2.62)             | 2 (0.7%)                                  | 8.21 (0.39-172.33)F                                |                              |
| 48-52                                                                                                                         | 15 (3.3%)                                 | 1.00                                               | 1.00                         | 0 (0.0%)                                  | 1.00                                               |                              |
| 53-57                                                                                                                         | 39 (5.6%)                                 | 1.71 (0.93-3.15)                                   | 2.22 (1.14-4.35)             | 6 (0.9%)                                  | 8.45 (0.47-150.75)F                                |                              |
| 58-70                                                                                                                         | 84 (4.5%)                                 | 1.38 (0.79-2.41)                                   | 1.60 (0.85-3.01)             | 12 (0.6%)                                 | 6.11 (0.36-103.76)F                                |                              |
| >70                                                                                                                           | 114 (9.5%)                                | 3.07 (1.77-5.31)<br>c=0.61                         | 3.11 (1.65-5.84)             | 14 (1.2%)                                 | 11.09 (0.66-186.83)F<br>c=0.61                     |                              |
| HbA1c AUC (OR per 10 units)                                                                                                   |                                           | 1.47 (1.34-1.62)<br>p<0.0001<br>c=0.62 (0.58-0.65) | 1.42 (1.28-1.59)<br>p<0.0001 |                                           | 1.40 (1.09-1.80)<br>p=0.0083<br>c=0.60 (0.50-0.69) | 1.40 (1.10-1.78)<br>p=0.0069 |
| <b>Follow-up 12-13 years from onset (n=2642)</b>                                                                              |                                           |                                                    |                              |                                           |                                                    |                              |
| <48                                                                                                                           | 1 (2.2%)                                  | 0.69 (0.08-6.07)                                   | 0.59 (0.07-5.23)             | 0 (0.0%)                                  | 3.46 (0.07-181.53)F                                |                              |
| 48-52                                                                                                                         | 5 (3.2%)                                  | 1.00                                               | 1.00                         | 0 (0.0%)                                  | 1.00                                               |                              |
| 53-57                                                                                                                         | 16 (4.4%)                                 | 1.40 (0.50-3.88)                                   | 1.52 (0.54-4.28)             | 2 (0.5%)                                  | 2.17 (0.10-45.80)F                                 |                              |
| 58-70                                                                                                                         | 49 (3.9%)                                 | 1.22 (0.48-3.11)                                   | 0.91 (0.35-2.38)             | 8 (0.6%)                                  | 2.12 (0.12-37.20)F                                 |                              |
| >70                                                                                                                           | 93 (11.5%)                                | 3.95 (1.58-9.89)<br>c=0.65                         | 2.51 (0.97-6.49)             | 10 (1.2%)                                 | 4.14 (0.24-71.49)F<br>c=0.60                       |                              |
| HbA1c AUC (OR per 10 units)                                                                                                   |                                           | 1.87 (1.64-2.13)<br>p<0.0001<br>c=0.67 (0.63-0.72) | 1.67 (1.42-1.97)<br>p<0.0001 |                                           | 2.07 (1.53-2.81)<br>p<0.0001<br>c=0.69 (0.56-0.82) | 2.01 (1.46-2.77)<br>p<0.0001 |
| <b>Follow-up 14-15 years from onset (n=1959)</b>                                                                              |                                           |                                                    |                              |                                           |                                                    |                              |
| <48                                                                                                                           | 0 (0.0%)                                  | 0.00 (0.00-infinity)                               | 0.00 (0.00-infinity)         | 0 (0.0%)                                  | 4.16 (0.08-228.66)F                                |                              |
| 48-52                                                                                                                         | 3 (3.4%)                                  | 1.00                                               | 1.00                         | 0 (0.0%)                                  | 1.00                                               |                              |
| 53-57                                                                                                                         | 6 (2.5%)                                  | 0.74 (0.18-3.03)                                   | 0.46 (0.10-2.11)             | 1 (0.4%)                                  | 1.13 (0.04-28.44)F                                 |                              |
| 58-70                                                                                                                         | 40 (4.1%)                                 | 1.23 (0.37-4.05)                                   | 0.87 (0.26-2.93)             | 6 (0.6%)                                  | 1.20 (0.07-21.83)F                                 |                              |
| >70                                                                                                                           | 70 (11.0%)                                | 3.54 (1.09-11.49)<br>c=0.65                        | 2.17 (0.64-7.31)             | 14 (2.2%)                                 | 4.16 (0.24-71.48)F,<br>c=0.68                      |                              |
| HbA1c AUC (OR per 10 units)                                                                                                   |                                           | 1.94 (1.66-2.26)<br>p<0.0001<br>c=0.68 (0.63-0.74) | 1.97 (1.61-2.41)<br>p<0.0001 |                                           | 2.52 (1.86-3.41)<br>p<0.0001<br>c=0.76 (0.65-0.88) | 2.64 (1.88-3.72)<br>p<0.0001 |
| <b>Follow-up 16-20 years from onset (n=1262)</b>                                                                              |                                           |                                                    |                              |                                           |                                                    |                              |
| <48                                                                                                                           | 0 (0.0%)                                  | 0.00 (0.00-infinity)                               | 0.00 (0.00-infinity)         | 0 (0.0%)                                  | 7.36 (0.12-455.21)F                                |                              |
| 48-52                                                                                                                         | 3 (4.8%)                                  | 1.00                                               | 1.00                         | 0 (0.0%)                                  | 1.00                                               |                              |
| 53-57                                                                                                                         | 9 (5.5%)                                  | 1.15 (0.30-4.39)                                   | 0.94 (0.23-3.79)             | 1 (0.6%)                                  | 1.15 (0.05-29.34)F                                 |                              |
| 58-70                                                                                                                         | 21 (3.4%)                                 | 0.69 (0.20-2.37)                                   | 0.55 (0.15-1.95)             | 1 (0.2%)                                  | 0.30 (0.01-7.62)F                                  |                              |
| >70                                                                                                                           | 59 (14.5%)                                | 3.34 (1.01-11.02)<br>c=0.69                        | 2.42 (0.70-8.32)             | 15 (3.7%)                                 | 4.95 (0.29-85.63)F<br>c=0.79                       |                              |
| HbA1c AUC (OR per 10 units)                                                                                                   |                                           | 2.16 (1.80-2.59)<br>p<0.0001<br>c=0.70 (0.64-0.77) | 2.14 (1.71-2.68)<br>p<0.0001 |                                           | 4.03 (2.74-5.92)<br>p<0.0001<br>c=0.88 (0.78-0.98) | 3.83 (2.58-5.70)<br>p<0.0001 |
| * Adjusted for age and sex                                                                                                    |                                           |                                                    |                              |                                           |                                                    |                              |
| ** Additionally adjusted for mean SBP, mean DBP, mean BMI, mean HDL, mean LDL, mean cholesterol, mean triglycerides, smoking. |                                           |                                                    |                              |                                           |                                                    |                              |
| F=Firth's penalized maximum likelihood estimation                                                                             |                                           |                                                    |                              |                                           |                                                    |                              |
